# Supplementary material for: Cross-talk between YAP and RAR-RXR Drives Expression of Stemness Genes to Promote 5-FU Resistance and Self-Renewal in Colorectal Cancer Cells
Source: Oxford University Press journal article supplement (doi:10.1158/1541-7786.mcr-20-0462), 2021-01-20

**Supplementary Figure S2: *ALDH1A3* and *LGR5* proximal RAREs co-occupancy by YAP, RAR $\alpha$ , RAR $\gamma$  and RXR $\alpha$  identified by YAP-induced CHIP in pPLPCX control vector -HT29 nuclear extracts.**

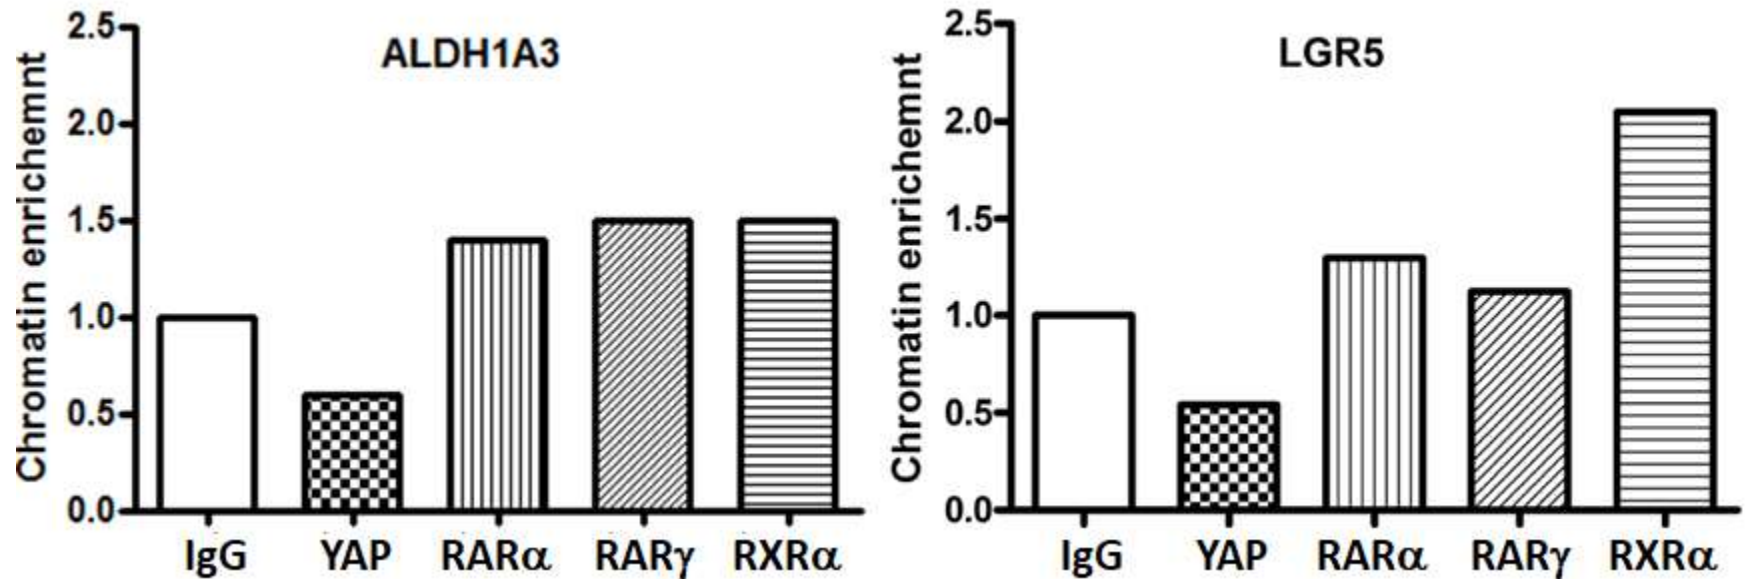

Supplement: 15417786mcr200462-sup-243652_3_supp_6800033_qlp8p5.pdf [file 15417786mcr200462-sup-243652_3_supp_6800033_qlp8p5.pdf]
