# Supplementary material for: Cross-talk between YAP and RAR-RXR Drives Expression of Stemness Genes to Promote 5-FU Resistance and Self-Renewal in Colorectal Cancer Cells
Source: Oxford University Press journal article supplement (doi:10.1158/1541-7786.mcr-20-0462), 2021-01-20
Supplement: 15417786mcr200462-sup-243652_3_supp_6800037_qlp8p6.docx [file 15417786mcr200462-sup-243652_3_supp_6800037_qlp8p6.docx]

**Supplementary Table S3: Proteomics of YAP Binding Partners in HT29-YAPdc CRC cells.**

| **Part A: Therapy resistance, DNA and Chromatin** | |
| --- | --- |
| **THERAPY RESISTANCE** | |
| ATP-binding cassette sub-family G member 2 | ***ABCG2*** Resistance to chemotherapy, Nucleus |
| Charged multivesicular body protein 4b | ***CHMP4B*** Resistance to Doxorubicin |
| Probable ATP-dependent RNA helicase DDX3 | ***DDX31*** DEAD-box RNA helicase Nucleus/ Cytoplasm  ***DDX52*** Radiation resistance |
| Heterogeneous nuclear ribonucleoproteins | ***HNRNP H1,U and U-Like 1*** |
| H, U and U-like 1 protein | Pluripotency/differentiation of hES cells  Anticancer drug resistance |
| HSP90-beta, HSP90-alpha, HSP90-A2 | ***HSP90AB1*** EMT metastasis drug resistance |
| Putative HSP90-2 | ***HSP90AA1*** Autophagy, drug resistance, stress- inductible  Inhibitor of stem cell differentiation  Nuclear Bodies organization |
| 78kDa glucose-regulated protein | ***HSPA5*** Ferroptotic cell death regulation  Gemcitabine resistance, endoplasmic reticulum |
| Stress-70 protein, mitochondrial | ***HSPA9*** Mitochondrial, metastasis, tumor recurrence |
| KH domain-containing, RNA binding, Signal Transduction-Associated protein 1 | ***KHDRBS1*** (Sam68) Radio-protection of colon mucosa  Nuclear Bodies, Oncogenic splicing factor |
| Kelch-like protein 8 | ***KLHL8*** Metastatic-lethal prostate cancer |
| Replication factor C subunit 1, C2, C4 | ***RFC1, C2, C4*** Priming recognition factor for DNA polymerase. Telomere maintenance, MMR, enhance the therapeutic impact of DNA-damaging drugs |
| DNA topoisomerase 1 and 2-alpha | ***TOP1*** Target of the anticancer drug irinotecan in CRC  DNA repair pathways  ***TOP2A*** DNA replication, recombination and repair  Suppression of chromosome translocation from DNA double-strand breaks |
| Heat shock protein 75kDa, mitochondrial | ***TRAP1*** Metabolic reprogramming, drug resistance (Antracyclins). ER stress protection |
| **DNA DAMAGE /REPAIR, REPLICATION** | |
| Serine-protein kinase ATM | ***ATM*** DNA-damage response, Cytoplasmic/ Nucleus |
| DNA mismatch repair protein Msh2 | ***MSH2*** MMR, MSI colorectal cancer |
| Origin recognition complex subunit | ***ORCS*** Binding replication origin. Helicase loading |
| X-ray repair cross-complementary protein 5 and -6 | ***XRCC5*** and ***XRCC6*** Double-strand break repair  Genetic polymorphism in HCC |
| Fanconi anemia group I protein | ***FANCI*** Heterodimer with FANCD2, DNA repair, nuclear localization of splicing factors, recruitment of DNA repair effectors to chromatin lesions. Interaction with MLH1 |
| **CHROMATIN, TRANSCRIPTION** | |
| Histones Types H1 (3) H2A (10), H2B (16) | Chromatin structure, DNA interactions, transcription |
| C-terminal-binding protein | ***CTBP1*** Transcriptional co-regulator  Chromatin remodeling |
| Antigen Ki-67 | ***MKi67*** Nuclear marker for cycling cells  Binding to chromosomes |
| Nuclear pore complex protein Nup93 | ***NUP93*** Chromosome interactions, Chromatin |
| Nuclear pore complex protein Nup98-Nup96 | ***NUP98*** Transcription, RNA splicing |
| DNA-dependent protein kinase catalytic subunit | ***PRKDC*** DNA repair, transcription |
| **Part B: RNA metabolism, Nucleo-Cytoplasmic-Plasma membrane shuttling, Autophagy** | |
| **RNA METABOLISM, SPLICING** | |
| Cirhin | ***CIRH1A*** Ribosome biogenesis, Cirrhosis, Nucleolar |
| Midasin | ***MDN1*** ATPase, Ribosome biogenesis, Nucleolus |
| Bystin  rRNA/tRNA 2-O-methytransferase  Fibrillarin-like protein 1 | ***BYSL*** Pre-ribosomal factor, overexpressed in HCC  ***FBLL1*** Nucleolus. |
| Poly(rC)-binding protein 1, 2 and 3 | ***PCBP1-2-3*** Splicing factors, Nuclear localization signals Tumor suppressor candidate |
| 60S and 40S ribosomal proteins L36 and S13 | ***RLP36*** and ***13*** Ribosome biogenesis |
| Splicing factor 3B subunit 1 | ***SF3B1*** Stress-sensitive, frequently mutated  Component of the spliceosome in cancer |
| Serine/arginine-rich splicing factor 3 and 7 | ***SRSF3*** and ***7*** Splicing regulation and mRNA export of cancer-related genes |
| U2 snRNP-associated SURP motif-containing protein | ***U2SURP*** Spliceosomal factor  Reciprocal regulation of alternative splicing factors |
| **NUCLEO - CYTOPLASMIC SHUTTLING, AUTOPHAGY** | |
| ADP-ribosylation factor 4-5-1-3 | ***ARF 4-5-1-3*** Tumor suppressor, Nucleolar |
| Exportin-2 | ***CSE1L*** Nuclear export (Proteins, Receptors) |
| Lamin-B1 | ***LMNB1*** Maintenance of nuclear structure |
| N-acetyltransferase 10 | ***NAT10*** Nucleolar, Autophagy inhibition, HCC tumorigenesis |
| Ras-related protein Rab-11A, Rab-11B | ***RAB11A, RAB11B*** Overlapping functions, GTPase activity, homeostasis of endosomal /lysosomal biogenesis |
| Exportin-1  V-type proton ATPase 116 kDa subunit a  isoform 1 | ***XPO1*** Nuclear export of YAP. Autophagy in several tumors  ***ATP6V0A1*** Subunit of endosomal /lysosomal V-ATPase proton pump. Regulation of autophagy and cancer invasion |
| Cullin-3 | ***CUL3*** Scaffold protein of E3-Ubiquitin ligases. Involved in tumorigenesis. |
| DnaJ homolog subfamily A member 1 | ***DNAJA1*** HSP40 Binding mutP53 |
|  | ***DNAJA3*** Co-chaperone activity, HSP family, role in NF-B signaling |
| **CELL ADHESION, POLARITY** | |
| Catenin delta | ***CTNND1*** p120 adhesive junctions plasma membrane |
| Junction plakoglobin | ***JUP***-Catenin) Cell-cell junctions component (E-cadherins, desmosomes), binding to LEF/TCF transcription factors, Wnt pathway |
| Transferrin receptor protein 1 | ***TFRC*** Endocytosis, key regulator of cellular iron homeostasis |
| Ephrin type A receptor 4-2-7-6 | ***EPHA 4-2-7-6*** Cell-Cell adhesion, Exosomes Chemoresistance. |
| Ephrin type B receptor 1-4-3-2 | ***EPHA 1-4-3-2*** Focal adhesion complexes, Invasion |
| Ezrin, Moesin, Radixin | ***EZR, MSN RDX*** Merlin and ERM family  Cell-cell junctions (Merlin) vesicles (MSN) |
| Plakophilin-2 | ***PKP2*** Desmosome component, Cell-cell adhesion |

_______________________________________________
