# Supplementary material for: Cross-talk between YAP and RAR-RXR Drives Expression of Stemness Genes to Promote 5-FU Resistance and Self-Renewal in Colorectal Cancer Cells
Source: Oxford University Press journal article supplement (doi:10.1158/1541-7786.mcr-20-0462), 2021-01-20
Supplement: 15417786mcr200462-sup-243652_3_supp_6800045_qlp8w6.docx [file 15417786mcr200462-sup-243652_3_supp_6800045_qlp8w6.docx]

**Supplementary Table S1: Antibodies, siRNAs and PCR primers**

| ***Antibodies:*** | | | | | |
| --- | --- | --- | --- | --- | --- |
|  | | **Company** | **Catalog Number** | | **Applications** |
| ***ChIP Experiments*** | |  |  | |  |
| YAP [EP1674Y] | | Abcam | Ab52771 | | IP, ChIP |
| RXR [EPR7106] | | Abcam | Ab125001 | | ChIP |
| RAR | | Abcam | Ab5904 | | ChIP |
| RAR | | Abcam | Ab28767 | | IF, IP, ChIP |
| RAR (H-6) | | Santa Cruz | Sc-398065 | | WB, IF, IP, ChIP |
|  | |  |  | |  |
| ***Western blots, IF*** | |  |  | |  |
| ALDH1A3 | | Genetex | GTX110784 | | WB, IF |
| LGR5 [EPR3065Y] | | Abcam | Ab75850 | | IF |
| Sp1 (1C6) | | Santa Cruz | Sc-420 | | WB |
| YAP (D8H1X) | | Cell Signaling | 14074 | | WB, IF |
| RAR (H-6) | | Santa Cruz | Sc-398065 | | WB, IF, IP, ChIP |
| ***siRNA sequences and qRT-PCR:*** | | | | | |
| **Genes** | **siRNAs** | | | **Catalog Number** | |
| Scrambled | ON-TARGET plus Non-targeting Pool | | | D-001810-10-20 | |
| *YAP1* | ON-TARGET plus Human YAP1 siRNA | | | L-012200-00-0005 | |
| ***Primers for ChIP Experiments:*** | | | | | |
| **Genes** | **Forward primers (5’ -> 3’)** | | | **Reverse primers (5’ -> 3’)** | |
| *ALDH1A3* | CCTCCGGGGCGAGAGAGC | | | CGCCTAATTGGCTGCGGG | |
| *LGR5*  *PAX6* | CACATAGGTGGGACTGCTCTCAG  AGCAACAAATGACACCACCC | | | CGATGCCAGAGTGACAGATGG  TCTCGCACAAACAACTTTCC | |
| ***Primers for qRT-PCR:*** | | | | | |
| **Genes** | **Forward primers (5’ -> 3’)** | | | **Reverse primers (5’ -> 3’)** | |
| *RPLP0* | GCAATGTTGCCAGTGTCTG | | | GCCTTGACCTTTTCAGCAA | |
| *ALDH1A3* | TGAATGGCACGAATCCAAGAG | | | CACGTCGGGCTTATCTCCT | |
| *RAR* | CTGTATCATCAACAAGGTGACCA | | | TGGTGATGAGCTCTTCTAACTGAG | |
| *RAR* | GATCACCCTCCTCAAGGCTG | | | AAGGTCATGGTGTCCTGCTC | |
| *CYP26A1* | TTTGGAGGACACGAAACCAC | | | CAGCATGAATCGGTCAGGAT | |
| *YAP* | TAGCCCTGCGTAGCCAGTTA | | | TCATGCTTAGTCCACTGTCTGT | |
| *LGR5* | CTTCCAACCTCAGCGTCTTC | | | TTTCCCGCAAGACGTAACTC | |
| *OCT4* | GGGAGATTGATAACTGGTGTGTT | | | GTGTATATCCCAGGGTGATCCTC | |
